# Supplementary material for: Psychosocial Pathways to STEM Engagement among Graduate Students in the Life Sciences
Source: Atypon-hosted journal article supplement (doi:10.1187/cbe.16-01-0036), 2016-08-25
Supplement: combinedsupmats.pdf [file combinedsupmats.pdf]

# Supplemental Material

*CBE—Life Sciences Education*

Clark *et al.*

## **Advisor Support Scale**

Please rate the faculty member that you will be working with/be advised by on the following items.

Scale: 1(Strongly Disagree) to 7 (Strongly Agree); additional Not Applicable (N/A) option

1. She/he is supportive.
2. She/he is helpful.
3. You meet with him/her regularly (often).

## **Domain Specific Self-Efficacy**

Indicate the extent to which you are confident of your ability to successfully complete the following tasks on a regular basis.

Scale: 1 (No Confidence) to 5 (Absolute Confidence)

1. Writing a paper for publication
2. Teaching
3. Writing a grant proposal
4. Presenting research results to an audience of peers.
5. Managing a research group or laboratory.
6. Supervising others
7. Mentoring others
8. Working in a team
9. Leading a team
10. Networking with others in your field
11. Networking with people outside your field
12. Clearly communicating your research to others
13. Applying the principals of ethical conduct of research to your own research
14. Becoming an expert in your field
15. Knowing the latest research techniques
16. Understanding how an academic organization works
17. Negotiating with people in a position of authority
18. Collaborating with other researchers
19. Keeping up with current advances in your field
20. Developing your CV
21. Preparing a research statement
22. Preparing a teaching statement
23. Conducting an academic job search
24. Giving a successful job interview
25. Facilitating interdisciplinary interactions
